**TITLE:** THE THERMOREGULATORY THRESHOLD IN HUMANS DURING NITROUS OXIDE/FENTANYL ANESTHESIA

**Authors:** D.I. Sessler, M.D., C.I. Olofsson, M.D., and E.H. Rubinstein, M.D., Ph.D.<sup>†</sup>

**Affiliation:** Department of Anesthesia, UCSF, 94143, and <sup>†</sup>Departments of Anesthesiology and Physiology, UCLA 90024

**Introduction.** Hypothermia produces thermoregulatory vasoconstriction in patients anesthetized with halothane<sup>1</sup> and isoflurane,<sup>2</sup> but the response thresholds are  $\approx 2.5^\circ\text{C}$  below normal. Both narcotics and  $\text{N}_2\text{O}$  inhibit thermoregulatory responses in animals.<sup>3,4</sup> We tested the hypothesis that  $\text{N}_2\text{O}$ /fentanyl anesthesia would decrease the thermoregulatory threshold in humans. We also compared the decrease in cutaneous capillary (nutritional) blood flow to the decrease in arterio-venous shunt (thermoregulatory) flow.

**Methods.** With approval from our Committee on Human Research, we studied 15 unpremedicated patients electively donating a kidney. Anesthesia was induced with halothane/ $\text{N}_2\text{O}$  and maintained with  $\text{N}_2\text{O}$  (70%), vecuronium, and fentanyl (a loading dose of 10 mcg/kg followed by an infusion of 4 mcg·kg<sup>-1</sup>·h<sup>-1</sup>). Patients were randomly assigned to receive no hypothermia precautions (n = 10) or additional warming measures including warm intravenous fluids and breathing circuit humidification (n = 5).

Constriction of thermoregulatory *arterio-venous shunts* was evaluated using skin-temperature gradients (fingertip surface temperature subtracted from forearm surface temperature). Significant vasoconstriction was prospectively defined as a skin temperature gradient  $\geq 4^\circ\text{C}$ <sup>1</sup> and the thermoregulatory threshold was defined as the esophageal temperature at which vasoconstriction occurred. Peripheral *capillary* vasoconstriction was evaluated using a Periflux<sup>®</sup> 3 laser Doppler monitor which correlates well with <sup>133</sup>Xe washout<sup>5</sup> and dynamic capillaroscopy.<sup>6</sup>

**Results.** The five patients actively warmed remained nearly-normothermic with a mean lowest esophageal temperature of  $35.8 \pm 0.4^\circ\text{C}$ . Skin-surface temperature gradients were  $< 1^\circ\text{C}$  in all actively warmed patients, and became  $\geq 4^\circ\text{C}$  in 6 of 10 hypothermic patients ( $P < 0.05$ ) between 100 and 190 min following induction. The thermoregulatory threshold in the six hypothermic patients who vasoconstricted was  $34.2 \pm 0.5^\circ\text{C}$  (SD) (fig. 1). The perfusion index and the skin-temperature gradient were correlated (regression equation: **Perfusion index =  $-7.9 \cdot \text{Gradient} + 67$** ;  $r^2 = 0.63$ ) (fig. 2).

**Discussion.** The thermoregulatory threshold during  $\text{N}_2\text{O}$ /fentanyl anesthesia,  $34.2 \pm 0.2^\circ\text{C}$ , was similar to that during halothane/oxygen,  $34.4 \pm 0.2^\circ\text{C}$ .<sup>1</sup> Vasoconstriction did not occur in four of 10 hypothermic patients given  $\text{N}_2\text{O}$ /fentanyl, but did in all hypothermic patients given halothane.<sup>1</sup> These four hypothermic patients probably reached a passive thermal steady state (constant core temperature without vasoconstriction).

Total digital skin blood flow is divided into arterio-venous shunt (thermoregulatory) and capillary (nutritional) components.<sup>7,8</sup> Thermoregulatory vasoconstriction is thought to occur primarily in the cutaneous arterio-venous shunts,<sup>9</sup> but we found that capillary flow also decreased significantly.

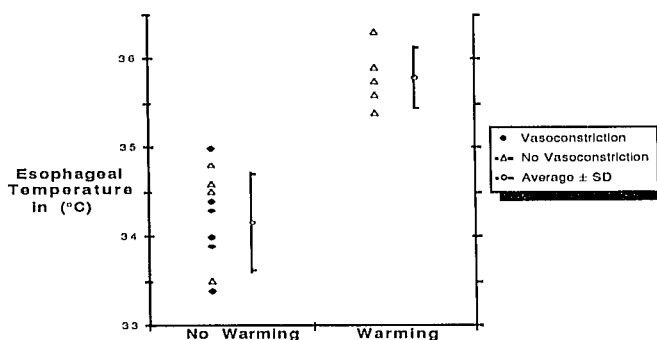

Figure 1. Significant vasoconstriction was observed in 6 of 10 elective kidney donors who became hypothermic (left side of figure). Vasoconstriction did not occur in 5 other patients maintained normothermic (right side of figure).

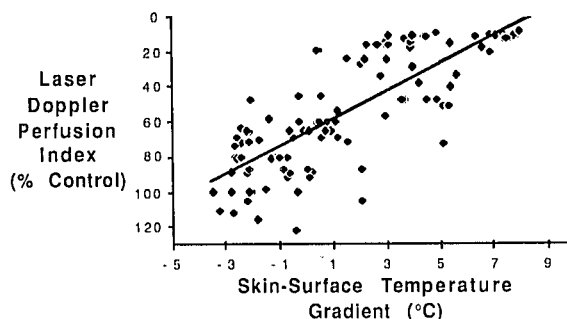

Figure 2. Skin-surface temperature gradient is plotted against the laser Doppler perfusion index (% control).

#### References.

- Sessler DI, Olofsson CI, Rubinstein EH, Beebe J. *Anesth Analg* 67:S202, 1988
- Sessler DI, Olofsson CI, Rubinstein EH. *Anesthesiology* 67:A405, 1987
- Lin MT, Chern YF, Wang Z, Wang HS. *Can J Physiol Pharmacol* 57:469, 1979
- Quock RM, Panek RW, Kouchich FJ, Rosenthal MA. *Life Sci* 41:683, 1987
- Holloway GA Jr., Watkins DW. *Investigative Dermatol* 69:306, 1977
- Fagrell B. *J Cardiovasc Pharmacol* 7 (Suppl 3):S53, 1985
- Coffman JD. *Clin Sci* 42:243, 1972
- Burton AC. *Blood Vessels and Circulation*. Edited by Montagna W, Ellis RA. New York, Pergamon Press, 1961, pp 117-122
- Coffman JD, Cohen AS. *N Engl J Med* 285:259, 1971
